# Supplementary material for: Peripheral glucocorticoid receptor antagonism by relacorilant with modest HPA axis disinhibition
Source: PubMed Central journal article supplement (PMC9874980; doi:10.1530/joe-22-0263), 2022-12-22

**A**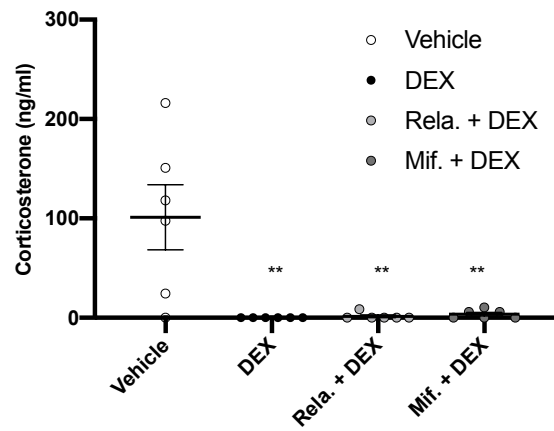**B**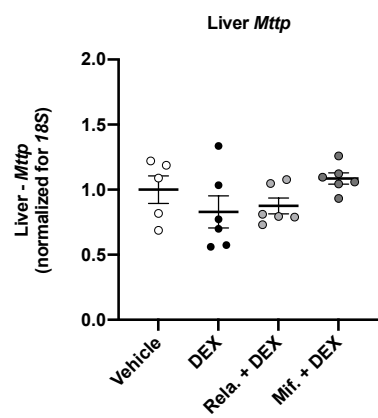**C**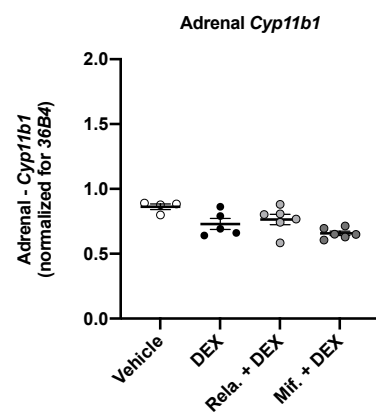**D**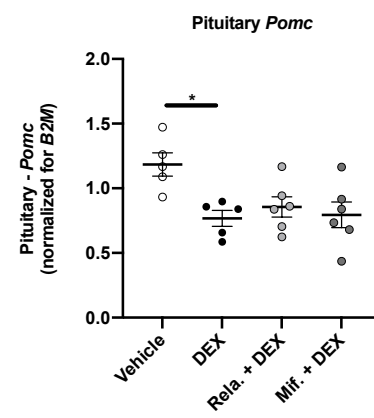**E**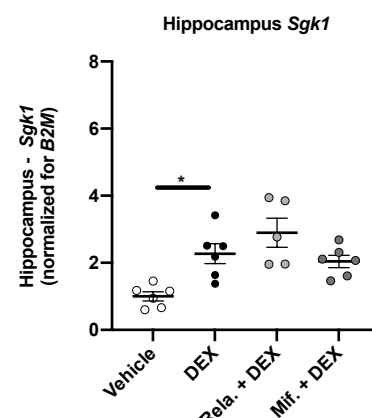**F**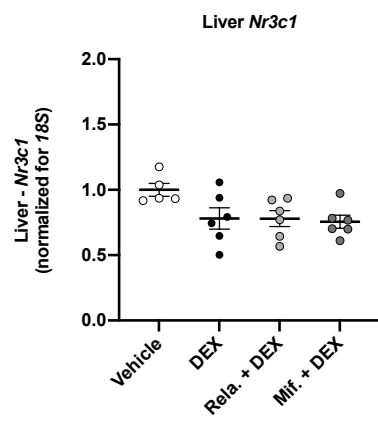**G**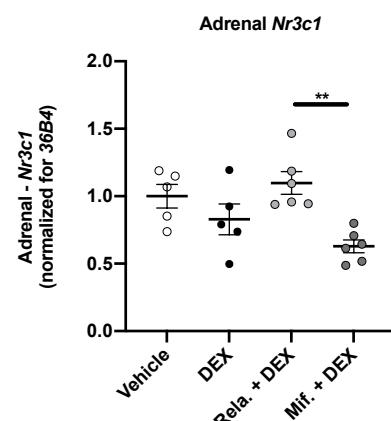**H**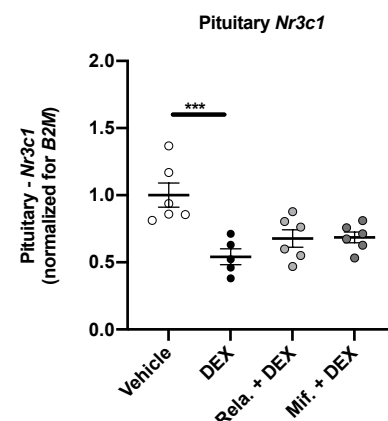**I**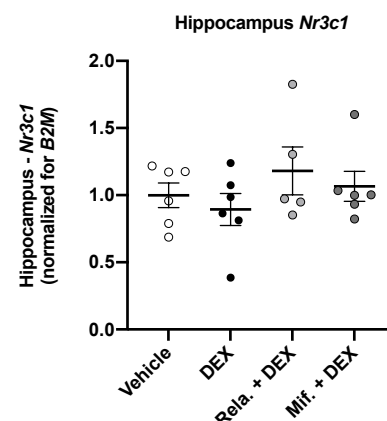

Supplement: supplementary_figure_2.pdf [file supplementary_figure_2.pdf]
