# Supplementary material for: Peripheral glucocorticoid receptor antagonism by relacorilant with modest HPA axis disinhibition
Source: PubMed Central journal article supplement (PMC9874980; doi:10.1530/joe-22-0263), 2022-12-22

**A**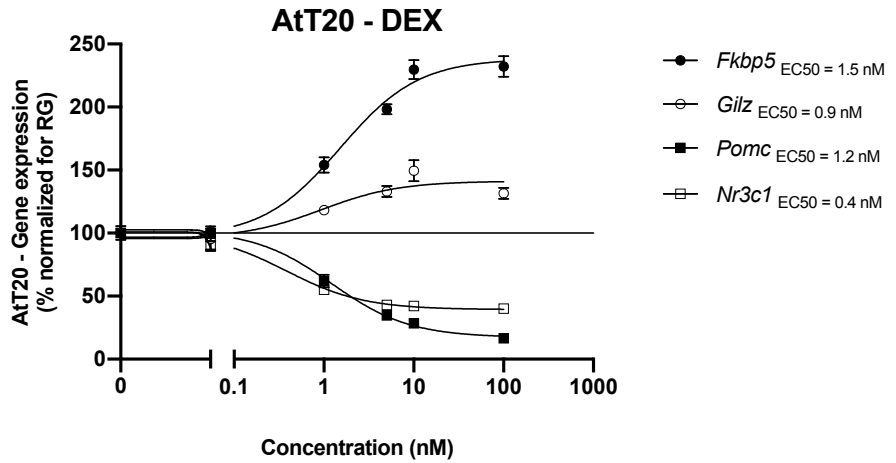**C**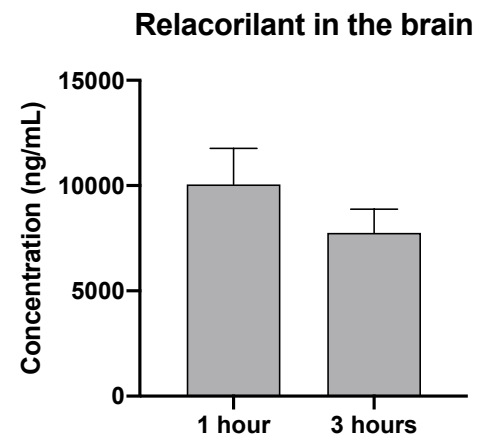**B**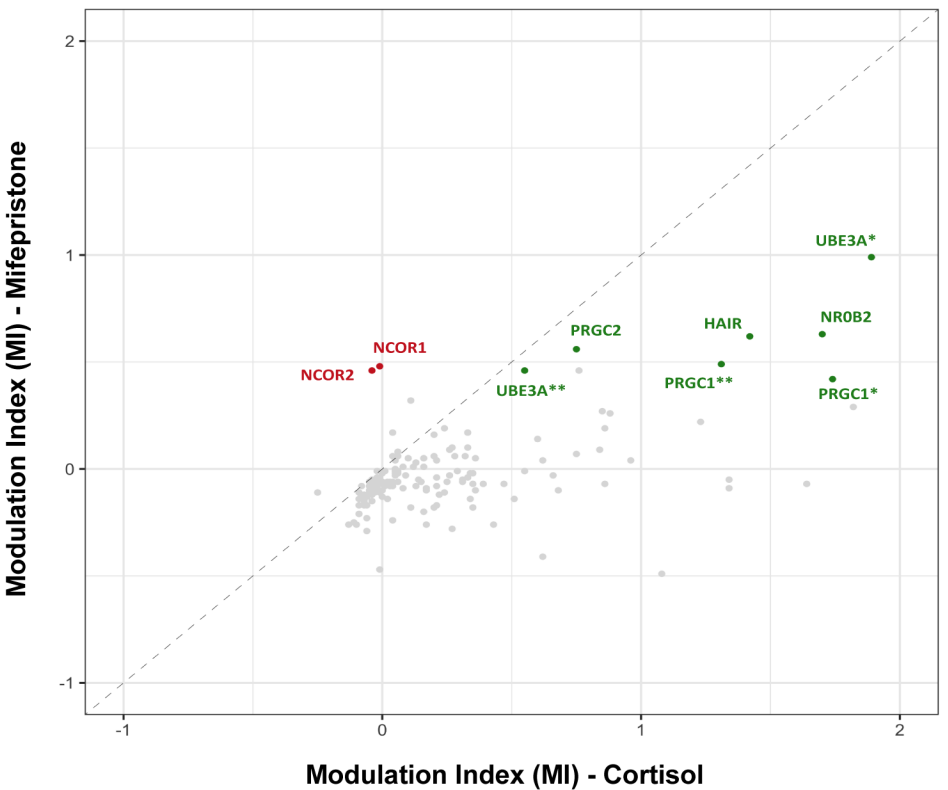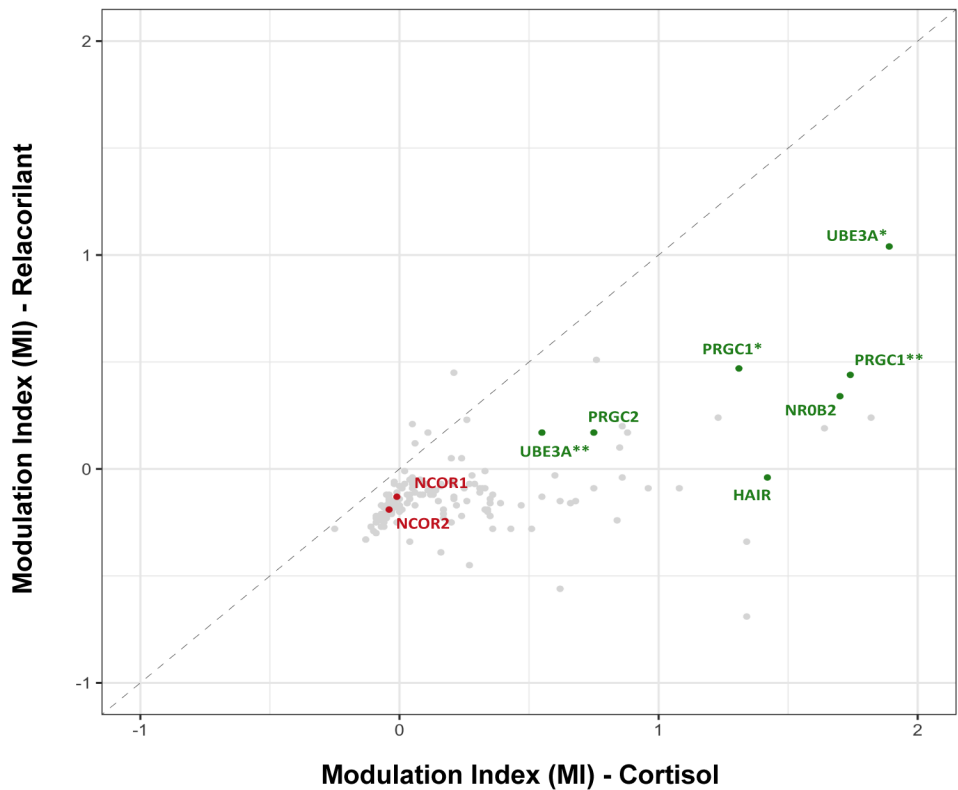

Supplement: supplementary_figure_3.pdf [file supplementary_figure_3.pdf]
