# Supplementary material for: Peripheral glucocorticoid receptor antagonism by relacorilant with modest HPA axis disinhibition
Source: PubMed Central journal article supplement (PMC9874980; doi:10.1530/joe-22-0263), 2022-12-22
Supplement: supplementary_table_1.pdf [file supplementary_table_1.pdf]

| Gene           | Assay       | Order_number             |                          |
|----------------|-------------|--------------------------|--------------------------|
| <i>Hprt</i>    | AtT20 cells | Mm03024075_m1            |                          |
| <i>GusB</i>    | AtT20 cells | Mm01197698_m1            |                          |
| <i>Gapdh</i>   | AtT20 cells | Mm99999915_g1            |                          |
| <i>Pomc</i>    | AtT20 cells | Mm00435874_m1            |                          |
| <i>Gilz</i>    | AtT20 cells | Mm01306210_g1            |                          |
| <i>Fkbp5</i>   | AtT20 cells | Mm00487401_m1            |                          |
| <i>Nr3c1</i>   | AtT20 cells | Mm00433832_m1            |                          |
| Gene           | Assay       | Forward primer (3'-5')   | Reverse primer (3'-5')   |
| <i>Fkbp5</i>   | Mouse       | GCCGACTGTGTGTGTAATGC     | CACAATACGCACTTGGGAGA     |
| <i>Gilz</i>    | Mouse       | TGGCCCTAGACAACAAGATTGAGC | CCACCTCCTCTCTCACAGCAT    |
| <i>Mt2a</i>    | Mouse       | CGCCTGCAAATGCAAACAATG    | TCGGAAGCCTCTTTGCAGAT     |
| <i>Nr3c1</i>   | Mouse       | CCCTCCCATCTAACCATCCT     | ACATAAGCGCCACCTTTCTG     |
| <i>Pomc</i>    | Mouse       | CGAGGCCTTTCCCTAGAGT      | CCAGGACTTGCTCCAAGCC      |
| <i>Mttp</i>    | Mouse       | CTCTTGGCAGTGCTTTTTCTCT   | GAGCTTGTATAGCCGCTCATT    |
| <i>Ucp1</i>    | Mouse       | TCAGGATTGGCCTCTACGAC     | TGCATTCTGACCTTCACGAC     |
| <i>Atgl</i>    | Mouse       | ACAGTGTCCTTCTCAGG        | TTGGTTCAGTAGGCCATTCC     |
| <i>Cyp11b1</i> | Mouse       | GTCAGATTCATTGGGGGCA      | GACATGCCCTCCCTGTATGG     |
| <i>Sgk1</i>    | Mouse       | AGAGGCTGGGTGCCAAGGAT     | CACTGGGCCCGCTCACATTT     |
| <i>18S</i>     | Mouse       | AGGACCTGGAGAGGCTGAAG     | CAGTGGTCTTGGTGTGCTGA     |
| <i>36B4</i>    | Mouse       | GGACCCGAGAAGACCTCCTT     | GCACATCACTCAGAATTTCAATGG |
| <i>B2m</i>     | Mouse       | TGACCGGCTTGTATGCTATC     | CAGTGTGAGCCAGGATATAG     |
| <i>B-Actin</i> | Mouse       | AACCGTGAAAAGATGACCCAGAT  | CACAGCCTGGATGGCTACGTA    |
